# Supplementary material
Source: HighWire-hosted journal article supplement (https://cmaj.ca/highwire/filestream/59232/field_highwire_adjunct_files/0/apnea-kend-1-at.pdf)
Supplement: apnea-kend-1-at.pdf [file apnea-kend-1-at.pdf]

| <b>Appendix 1 (as supplied by the authors): Overview of published studies that evaluated the association between obstructive sleep apnea and incident cancer or death from cancer</b>                                                                                                                                                                                                                                                                                                                                                                             |                                                                                                                                   |                                                                                                                                                  |                                                                                                                                                                                                        |                                                                                                               |
|-------------------------------------------------------------------------------------------------------------------------------------------------------------------------------------------------------------------------------------------------------------------------------------------------------------------------------------------------------------------------------------------------------------------------------------------------------------------------------------------------------------------------------------------------------------------|-----------------------------------------------------------------------------------------------------------------------------------|--------------------------------------------------------------------------------------------------------------------------------------------------|--------------------------------------------------------------------------------------------------------------------------------------------------------------------------------------------------------|---------------------------------------------------------------------------------------------------------------|
|                                                                                                                                                                                                                                                                                                                                                                                                                                                                                                                                                                   | <b>Nieto et al,<sup>1</sup> 2012</b>                                                                                              | <b>Campos-Rodriguez et al,<sup>2</sup> 2013</b>                                                                                                  | <b>Christensen et al,<sup>3</sup> 2013</b>                                                                                                                                                             | <b>Marshall et al,<sup>4</sup> 2014</b>                                                                       |
| <b>Population</b>                                                                                                                                                                                                                                                                                                                                                                                                                                                                                                                                                 | Community-based (the Wisconsin Sleep Study)                                                                                       | Clinic-based (7 Spanish teaching hospitals)                                                                                                      | Community-based (the Copenhagen City Heart Study)                                                                                                                                                      | Community-based (the Busselton Health Study)                                                                  |
| <b>Cohort Size*</b>                                                                                                                                                                                                                                                                                                                                                                                                                                                                                                                                               | N total = 1,522<br>N (oxygen saturation) = 1,306<br>N (AHI ≥ 15) = 143                                                            | N total = 4,910<br>N (AHI ≥ 18.7) = 3,273                                                                                                        | N total = 8,783 (snoring and breathing cessations)<br>N (the ESS) = 5,894 (1998)<br>N (snoring, breathing cessations, and DS) = 3,647                                                                  | N = 390<br>N (RDI ≥ 15) = 17                                                                                  |
| <b>Outcome: no. of events</b>                                                                                                                                                                                                                                                                                                                                                                                                                                                                                                                                     | Cancer deaths:<br>Total = 50<br>Oxygen saturation subsample = 33                                                                  | Incident cancer = 261                                                                                                                            | Incident cancer:<br>Total = 1,985<br>1998 population = 1,097                                                                                                                                           | Incident cancer = 125<br>Cancer deaths = 39                                                                   |
| <b>Follow-up</b>                                                                                                                                                                                                                                                                                                                                                                                                                                                                                                                                                  | Maximum 22 years                                                                                                                  | Median 4.5 years                                                                                                                                 | Average 13 years                                                                                                                                                                                       | Maximum 20 years                                                                                              |
| <b>Obstructive sleep apnea diagnosis</b>                                                                                                                                                                                                                                                                                                                                                                                                                                                                                                                          | Full polysomnography                                                                                                              | Either full standard polysomnography (32%) or respiratory polygraphy (ECG, oronasal flow and pressure, respiratory movements, SaO <sub>2</sub> ) | Self-reported snoring, breathing cessation and DS (measured by ESS)                                                                                                                                    | MESAM IV: 4-channel portable home-monitoring device (snoring, heart rate, SaO <sub>2</sub> , body position)   |
| <b>Cancer diagnosis: sources</b>                                                                                                                                                                                                                                                                                                                                                                                                                                                                                                                                  | Cancer mortality: the National Death Index and the Wisconsin State Bureau of Health Information and Policy, Vital Records Section | Cancer incidence: cancer and pathology registries, medical records and computerized databases, primary care physician in charge of the patient   | Cancer incidence: from nationwide hospital discharge registry                                                                                                                                          | Cancer incidence and mortality: the Western Australian Cancer Registry, the Western Australian Death register |
| <b>Analyses, variables in final model</b>                                                                                                                                                                                                                                                                                                                                                                                                                                                                                                                         | Cox regression analyses<br>Age, sex, BMI, BMI <sup>2</sup> , and smoking                                                          | Cox regression analyses<br>Age, BMI, sex, alcohol intake, smoking, type of sleep study, and hospital of enrolment as random effects              | Cox regression analyses<br>Main: age, BMI, tobacco and alcohol consumption, educational and marital status, physical activity.<br>Additional: lung function, menopausal status and hormone therapy use | Cox regression analyses<br>Age, sex, BMI, waist circumference, smoking status                                 |
| <b>Results: HR (95% CI)†</b>                                                                                                                                                                                                                                                                                                                                                                                                                                                                                                                                      | 4.8 (1.7–13.2) (AHI > 30 vs. < 5)<br>8.6 (2.6–28.7) (HI > 11.2 vs. < 0.8)                                                         | 1.06 (0.62–1.80) (AHI > 30 vs. < 5)<br>2.33 (1.57–3.46) (HI > 12 vs. < 1.2)                                                                      | Often/always vs. seldom/rarely<br>1.04 (0.90–1.21) for snoring;<br>1.07 (0.70–1.62) for stop breathing;<br>1.13 (0.89–1.44) for 2–3 vs. 0 SBD symptoms                                                 | RDI ≥ 15 vs. RDI < 5<br>Death: 3.4 (1.1–10.2)<br>Incidence: 2.5 (1.2–5.0)                                     |
| <b>Interactions</b>                                                                                                                                                                                                                                                                                                                                                                                                                                                                                                                                               | predictors and BMI, sleepiness, sex and age:<br>NS                                                                                | - age and predictors (p < 0.05)<br>- sex and HI (p = 0.05)<br>- predictors and BMI: NS                                                           | age and DS was suspected                                                                                                                                                                               | sex and RDI: NS                                                                                               |
| <p>Note: AHI = apnea-hypopnea index (events/hour); BMI = body mass index; DS = daytime sleepiness; ECG = electrocardiography; ESS = Epworth Sleepiness Scale; HI (hypoxemia index) = percent sleep time below 90% oxyhemoglobin saturation; HR = hazard ratio; IQR = interquartile rang; NS = not significant; RDI = respiratory disturbance index, SaO<sub>2</sub> = oxygen saturation; SBD = sleep breathing disorder; SD = standard deviation.<br/>*Sample size for cancer analyses.<br/>†Analyses based on the fully adjusted model on the entire sample.</p> |                                                                                                                                   |                                                                                                                                                  |                                                                                                                                                                                                        |                                                                                                               |

## References

1. Nieto FJ, Peppard PE, Young T, et al. Sleep-disordered breathing and cancer mortality: results from the Wisconsin Sleep Cohort Study. *Am J Respir Crit Care Med* 2012;186:190-4.
2. Campos-Rodriguez F, Martinez-Garcia MA, Martinez M, et al. Association between obstructive sleep apnea and cancer incidence in a large multicenter Spanish cohort. *Am J Respir Crit Care Med* 2013;187:99-105.
3. Christensen AS, Clark A, Salo P, et al. Symptoms of sleep disordered breathing and risk of cancer: a prospective cohort study. *Sleep* 2013;36:1429-35.
4. Marshall NS, Wong KK, Cullen SR, et al. Sleep apnea and 20-year follow-up for all-cause mortality, stroke, and cancer incidence and mortality in the busselton health study cohort. *J Clin Sleep Med* 2014;10:355-62.
